# Supplementary material for: Engineering high-valence metal-enriched cobalt oxyhydroxide catalysts for an enhanced OER under near-neutral pH conditions
Source: Royal Society of Chemistry journal article supplement (doi:10.1039/d4nr01168f), 2024-01-01
Supplement: d4nr01168f1.pdf [file d4nr01168f1.pdf]

## Supplement materials

# **Engineering High-Valence Metal-Enriched Cobalt Oxyhydroxide Catalysts for Enhanced OER in Near pH- Neutral Condition**

Ruijing Dong<sup>a,b</sup>, Jiajian Gao<sup>b</sup>, Truong-Giang Vo<sup>b</sup>, Shibo Xi<sup>b</sup>, Choon Wee Kee<sup>b</sup>, Xun  
Cao<sup>b</sup>, Wei Chu<sup>a\*</sup>, Yan Liu<sup>b\*</sup>

<sup>a</sup> School of Chemical Engineering, Sichuan University, No. 24 South Section 1, Yihuan Road, Chengdu, 610065, China.

<sup>b</sup> Institute of Sustainability for Chemicals, Energy and Environment (ISCE<sup>2</sup>), Agency for Science, Technology, and Research (A\*STAR), 1 Pesek Road, Jurong Island, Singapore 627833, Republic of Singapore

\*Corresponding authors:

[chuwei1965@scu.edu.cn](mailto:chuwei1965@scu.edu.cn) (W Chu);

[liu\\_yan@isce2.a-star.edu.sg](mailto:liu_yan@isce2.a-star.edu.sg) (Y Liu).

## Supplementary Figures

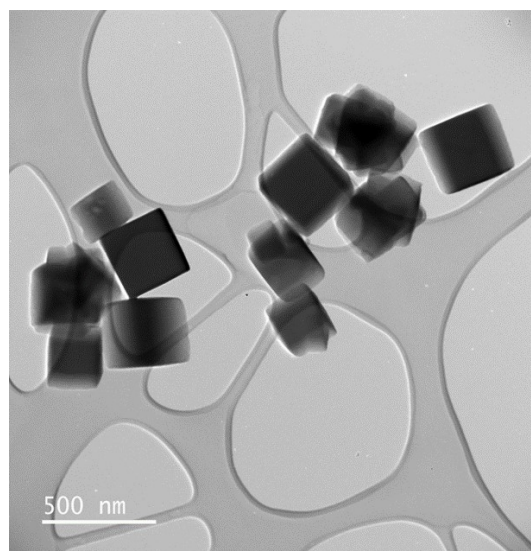

Fig. S1 TEM image of ZIF-67

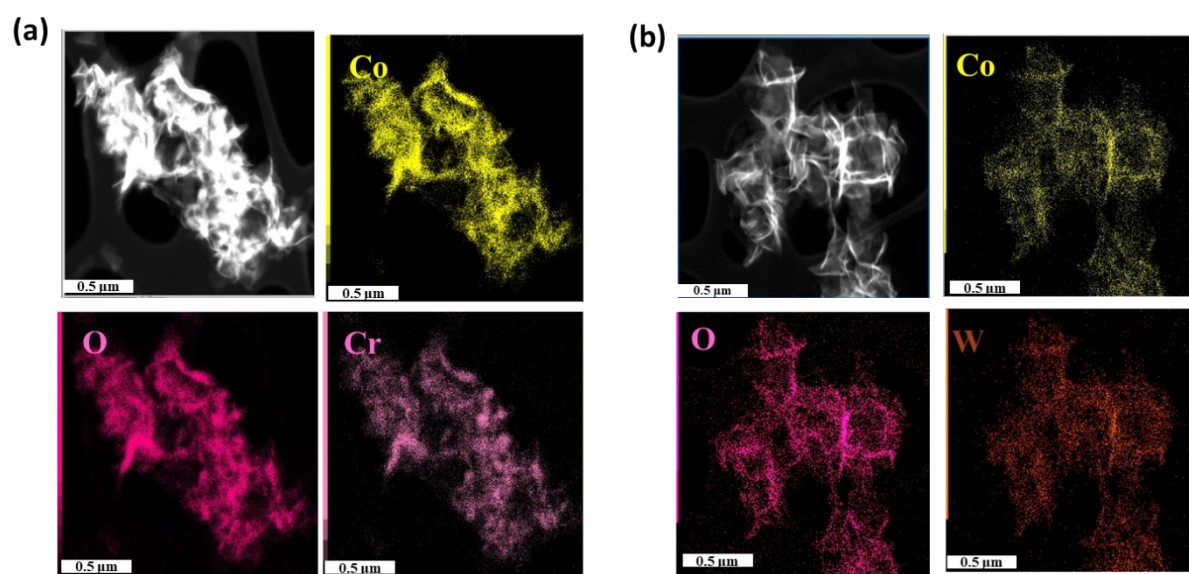

Fig. S2 TEM mapping images of Cr-Co(OH)<sub>2</sub> (a) and W-Co(OH)<sub>2</sub> (b)

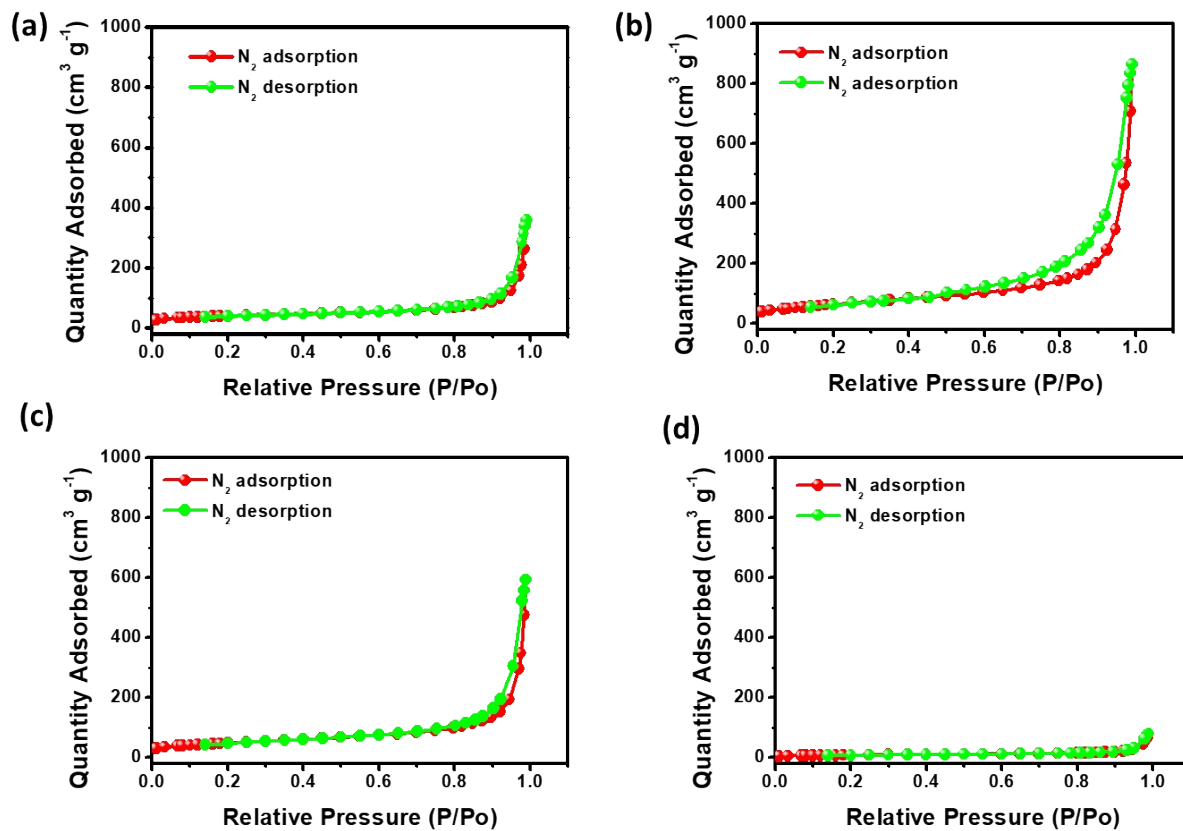

Fig. S3  $\text{N}_2$  adsorption-desorption isotherms of  $\text{Mo-Co(OH)}_2$  (a),  $\text{Cr-Co(OH)}_2$  (b),  $\text{W-Co(OH)}_2$  (c) and  $\text{Co(OH)}_2$  (d)

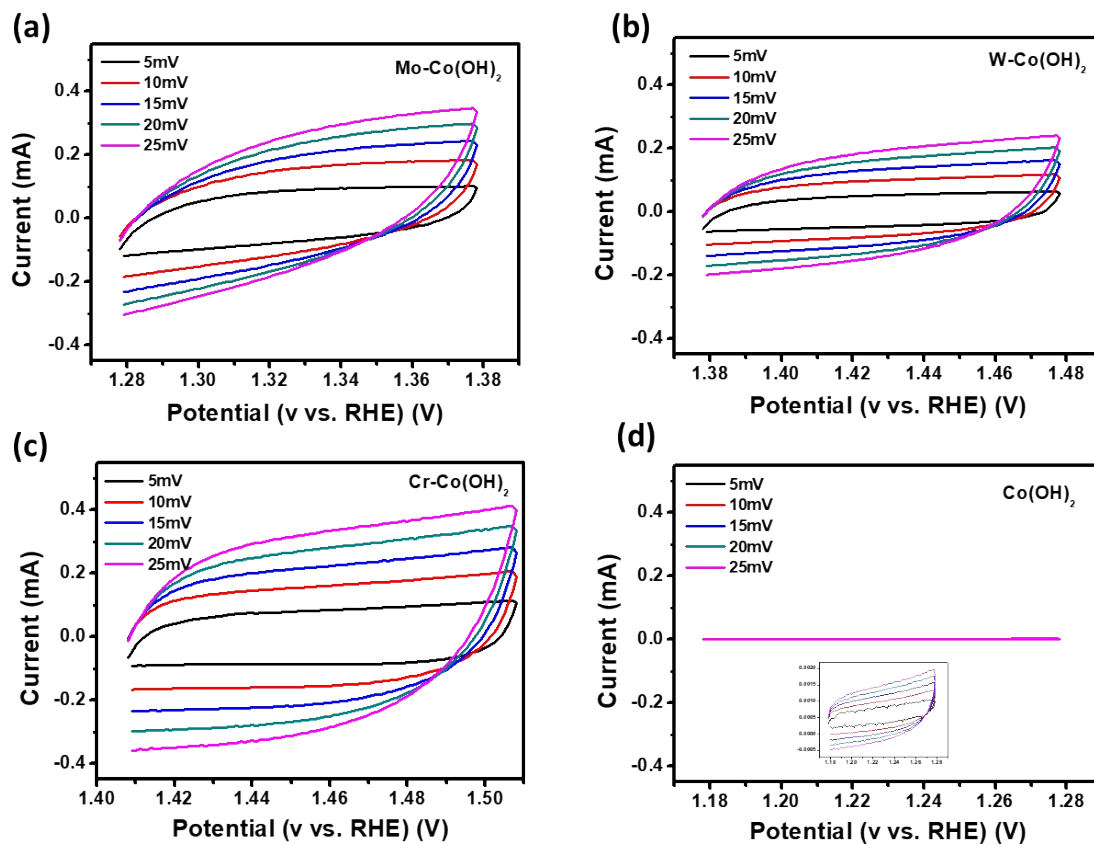

Fig. S4 Double electronic layer of Mo-Co(OH)<sub>2</sub> (a), W-Co(OH)<sub>2</sub> (b), Cr-Co(OH)<sub>2</sub> (c) and Co(OH)<sub>2</sub> (d)

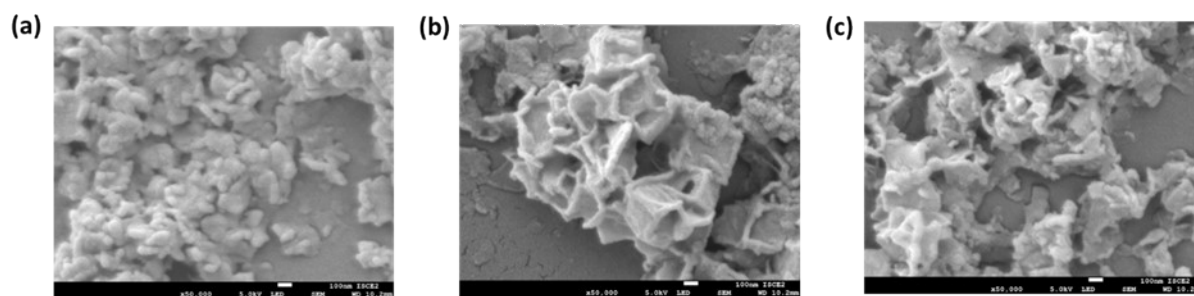

Fig. S5 SEM image of Mo-Co(OH)<sub>2</sub> (a), Cr-Co(OH)<sub>2</sub> (b) and W-Co(OH)<sub>2</sub> (c).

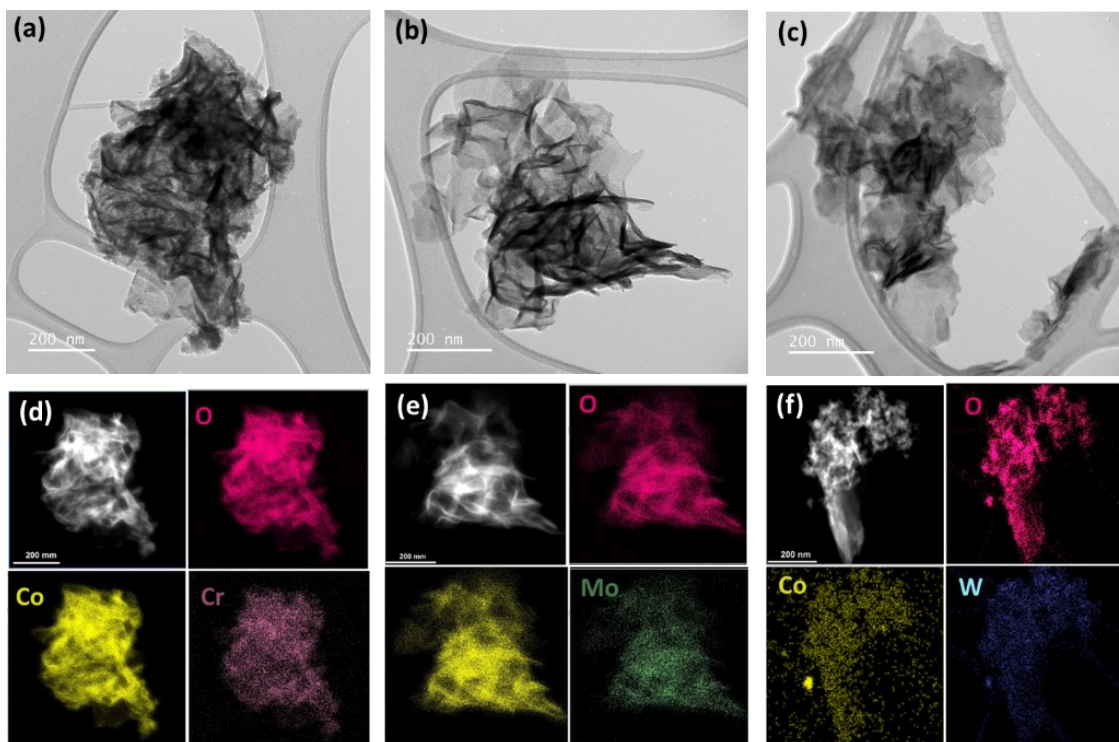

Fig. S6 TEM image and mapping of Cr-Co(OH)<sub>2</sub> (a,d), Mo-Co(OH)<sub>2</sub> (b,e) and W-Co(OH)<sub>2</sub> (c,f) after stability test.

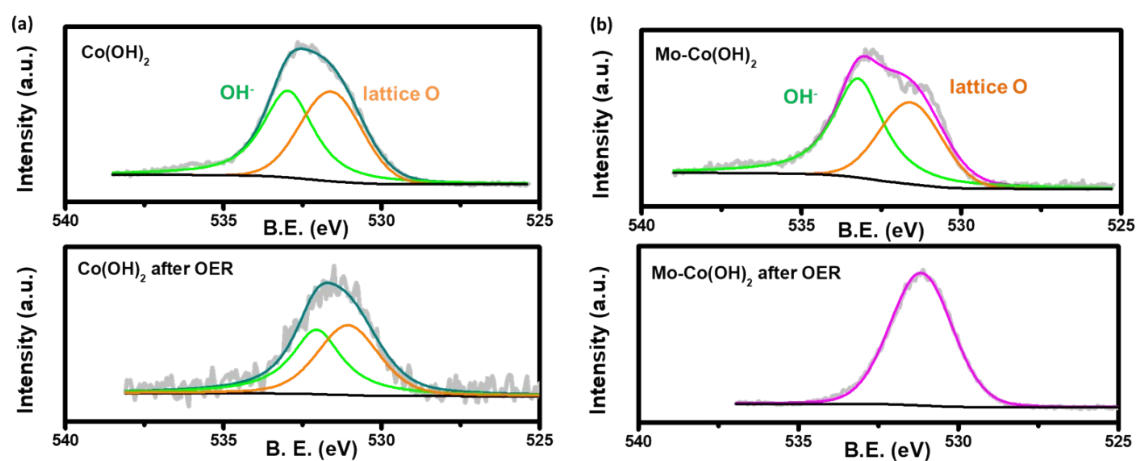

Fig. S7 XPS absorption spectra of O1s for Co(OH)<sub>2</sub> (a) and Mo-Co(OH)<sub>2</sub> (b)

As shown in Fig.S7, compared with unmodified Co(OH)<sub>2</sub>, Mo promotes the transformation of OH to OOH as lattice oxygen during the OER process.

## Supplementary Tables

Table S1. ECSA of different catalysts

| <b>catalyst</b>        | <b>ECSA (c</b> |
|------------------------|----------------|
| Mo-Co(OH) <sub>2</sub> | 157.50         |
| Cr-Co(OH) <sub>2</sub> | 280.00         |
| W-Co(OH) <sub>2</sub>  | 147.50         |
| Co(OH) <sub>2</sub>    | 0.75           |

Table S2. Fourier Transforms k<sub>2</sub>-weight of Co K-edge curve fitting

| <b>Sample</b>            | <b>path</b>  | <b>CN</b>  | <b>σ<sup>2</sup></b> | <b>ΔE<sub>0</sub></b> | <b>R</b>      | <b>R-factor</b> |
|--------------------------|--------------|------------|----------------------|-----------------------|---------------|-----------------|
| Co foil                  | Co-Co        | 12 (fixed) | 0.006(0.004)         | -2.6                  | 2.492 (0.007) | 0.006           |
| Co(OH) <sub>2</sub> -std | Co-O         | 6 (fixed)  | 0.009(0.001)         | -1.63                 | 2.088 (0.008) | 0.005           |
|                          | Co-Co        | 6 (fixed)  | 0.009(0.001)         |                       | 3.192 (0.009) |                 |
| Mo-Co(OH) <sub>2</sub>   | Co-O         | 5.1 (0.6)  | 0.013(0.002)         | -1.47                 | 2.055 (0.01)  | 0.004           |
|                          | Co-Co/ Co-Mo |            | 0.01(0.001)          |                       | 3.126 (0.008) |                 |

Table S3. Comparison of catalytic performance in this work with what has reported in literature.

| <b>catalyst</b>        | <b>Electrolyte</b>      | <b>On glassy carbon<br/>Overpotential<br/>(mV)<br/>at 10 mA cm<sup>-2</sup></b> | <b>On Carbon paper<br/>Overpotential<br/>(mV)<br/>at 10 mA cm<sup>-2</sup></b> | <b>Ref.</b> |
|------------------------|-------------------------|---------------------------------------------------------------------------------|--------------------------------------------------------------------------------|-------------|
| Mo-Co(OH) <sub>2</sub> | 0.5 M KHCO <sub>3</sub> | 550                                                                             | 390                                                                            | This work   |
| Cr-Co(OH) <sub>2</sub> | -                       | 570                                                                             | 412                                                                            | This work   |
| W-Co(OH) <sub>2</sub>  | -                       | 640                                                                             | 468                                                                            | This work   |
| a-Co <sub>2</sub> P    | 0.1 M PBS               | ~320                                                                            | -                                                                              | 1           |
| PO-CoFe-OH             | 0.1 M KHCO <sub>3</sub> |                                                                                 | 365                                                                            | 2           |
| Co-Pi                  | 0.1 M KPi               | -                                                                               | 550                                                                            | 3           |

Reference:

1. K. Xu, H. Cheng, L. Liu, H. Lv, X. Wu, C. Wu and Y. Xie, *Nano Lett*, 2017, **17**, 578-583.
2. D. Zhong, T. Li, D. Wang, L. Li, J. Wang, G. Hao, G. Liu, Q. Zhao and J. Li, *Nano Research*, 2021, **15**, 162-169.
3. M. W. Kanan and D. G. Nocera, *Science*, 2008, **321**, 1072-1075.
